# Supplementary material for: Hierarchical 3D-ordered macro-/mesoporous organosilicas with inverse opal morphology synthesized by a combination of nanocasting and pseudomorphic transformation
Source: Royal Society of Chemistry journal article supplement (doi:10.1039/c7tc01394a), 2017-01-01
Supplement: c7tc01394a1.pdf [file c7tc01394a1.pdf]

## Supporting Information

### Hierarchically 3D Ordered Macro-/Mesoporous Organosilica with an Inverse Opal Morphology Designed by a Combination of Nanocasting and Pseudomorphic Transformation

Tamás Simon,<sup>a</sup> Felix J. Brieler<sup>a</sup> and Michael Fröba<sup>a,\*</sup>

<sup>a</sup> University of Hamburg, Department of Chemistry, Institute of Inorganic and Applied Chemistry, University of Hamburg, Martin-Luther-King-Platz 6, 20146 Hamburg, Germany.

\*E-mail: froeba@chemie.uni-hamburg.de

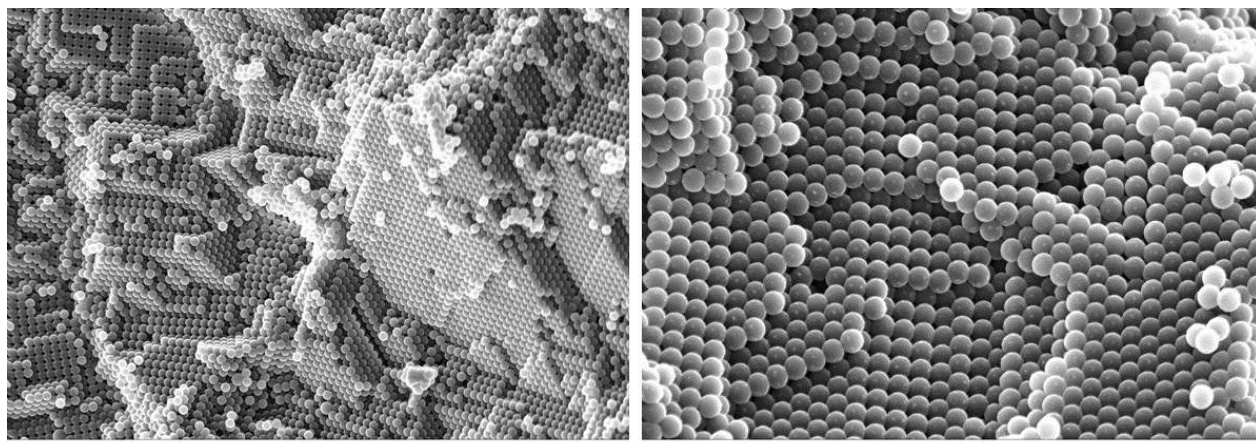

**Fig. S1** SEM images of the used PMMA colloid crystal. Scale bar in the left SEM image is 5  $\mu\text{m}$  and in the right SEM image 2  $\mu\text{m}$ .

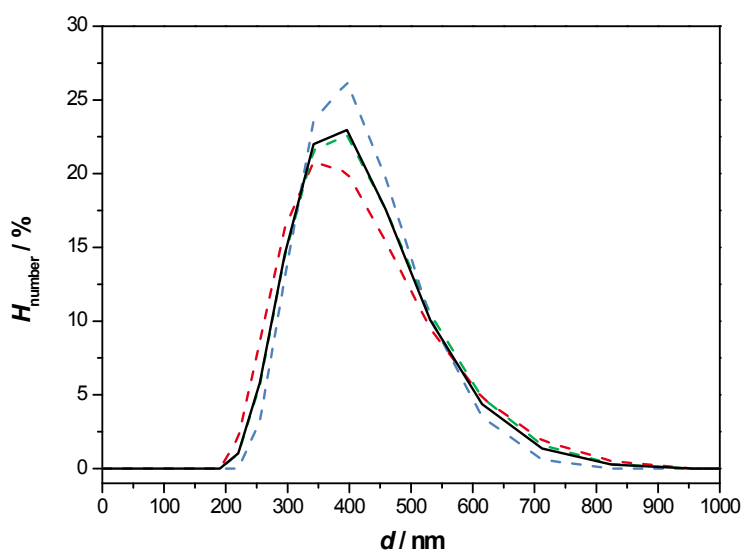

**Fig. S2** Particle size distributions of the used PMMA particle. Measurement 1 red dashed line, measurement 2 green dashed line, measurement 3 blue dashed line, arithmetic mean value of the three measurements black line.

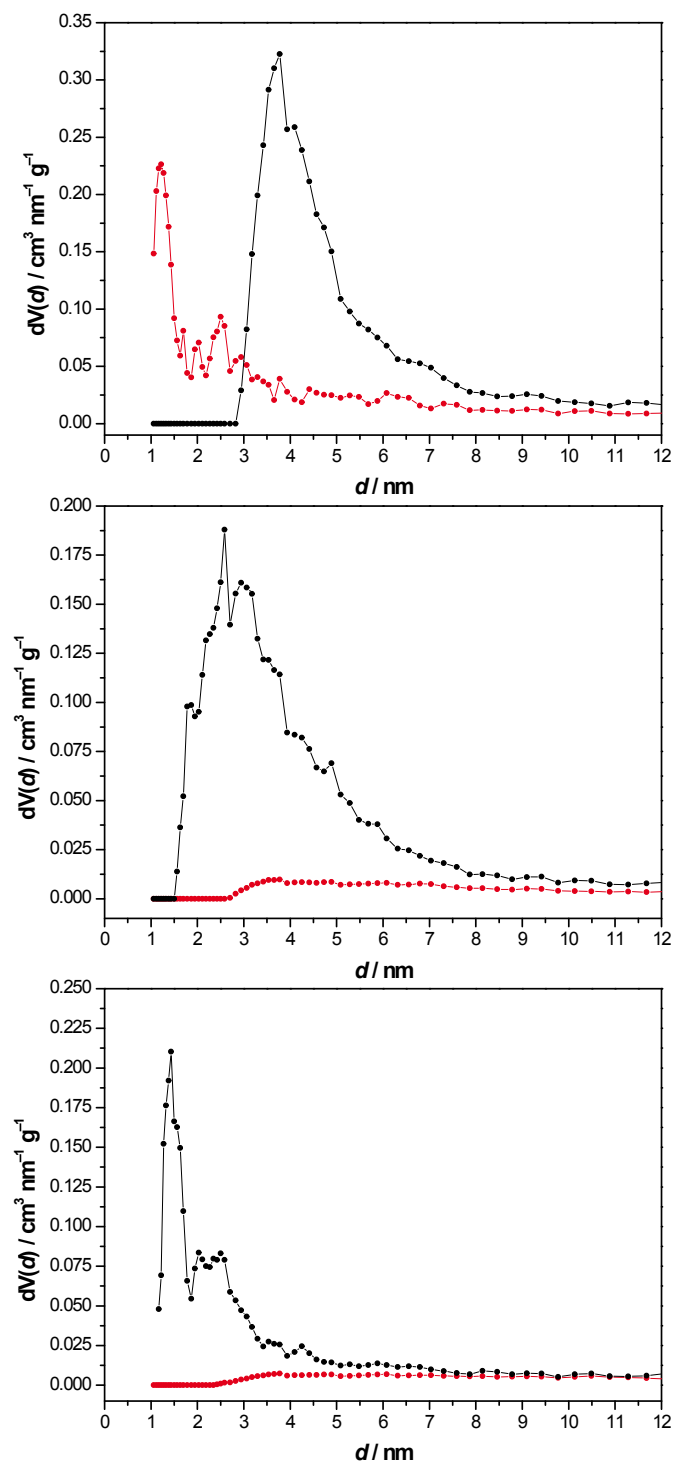

**Fig. S3** Pore size distributions of the different inverse opal structured organosilica materials before and after the pseudomorphic transformation synthesis step (NLDFT-kernel:  $\text{N}_2$ , 77 K, silica, cylind. pores, adsorption branch). Red curves before alkaline surfactant treatment, black curves after alkaline surfactant treatment. Inverse opal phenylene-bridged material (top), inverse opal divinylbenzene-bridged material (center), inverse opal divinylaniline-bridged material (bottom).

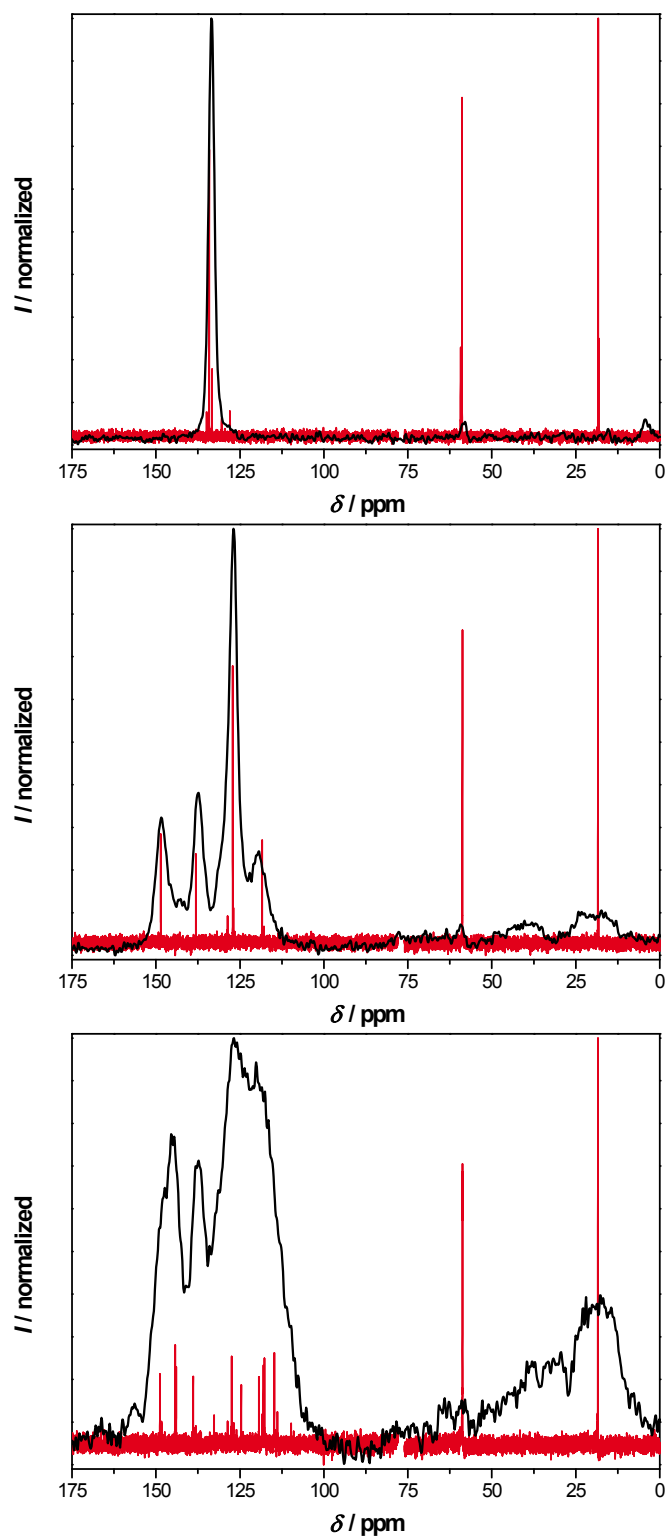

**Fig. S4**  $^{13}\text{C}$  NMR spectra of the different inverse opal structured organosilica materials (black curves, solid state after surfactant extraction) and of the precursors (red curves, liquid state, measured in  $\text{CDCl}_3$ :  $\delta \approx 77$  ppm, the  $\text{CDCl}_3$ -signal was not displayed). Inverse opal phenylene-bridged material (top), inverse opal divinylbenzene-bridged material (center), inverse opal divinylaniline-bridged material (bottom).
